# Supplementary material for: Interactome Analysis Identifies MSMEI_3879 as a Substrate of Mycolicibacterium smegmatis ClpC1
Source: Microbiol Spectr. 2023 Jun 21;11(4):e04548-22. doi: 10.1128/spectrum.04548-22 (PMC10433963; doi:10.1128/spectrum.04548-22)
Supplement: Supplemental file 3 — Supplemental material. Download spectrum.04548-22-s0003.pdf, PDF file, 14.9 MB [file spectrum.04548-22-s0003.pdf]

## SUPPLEMENTAL MATERIAL

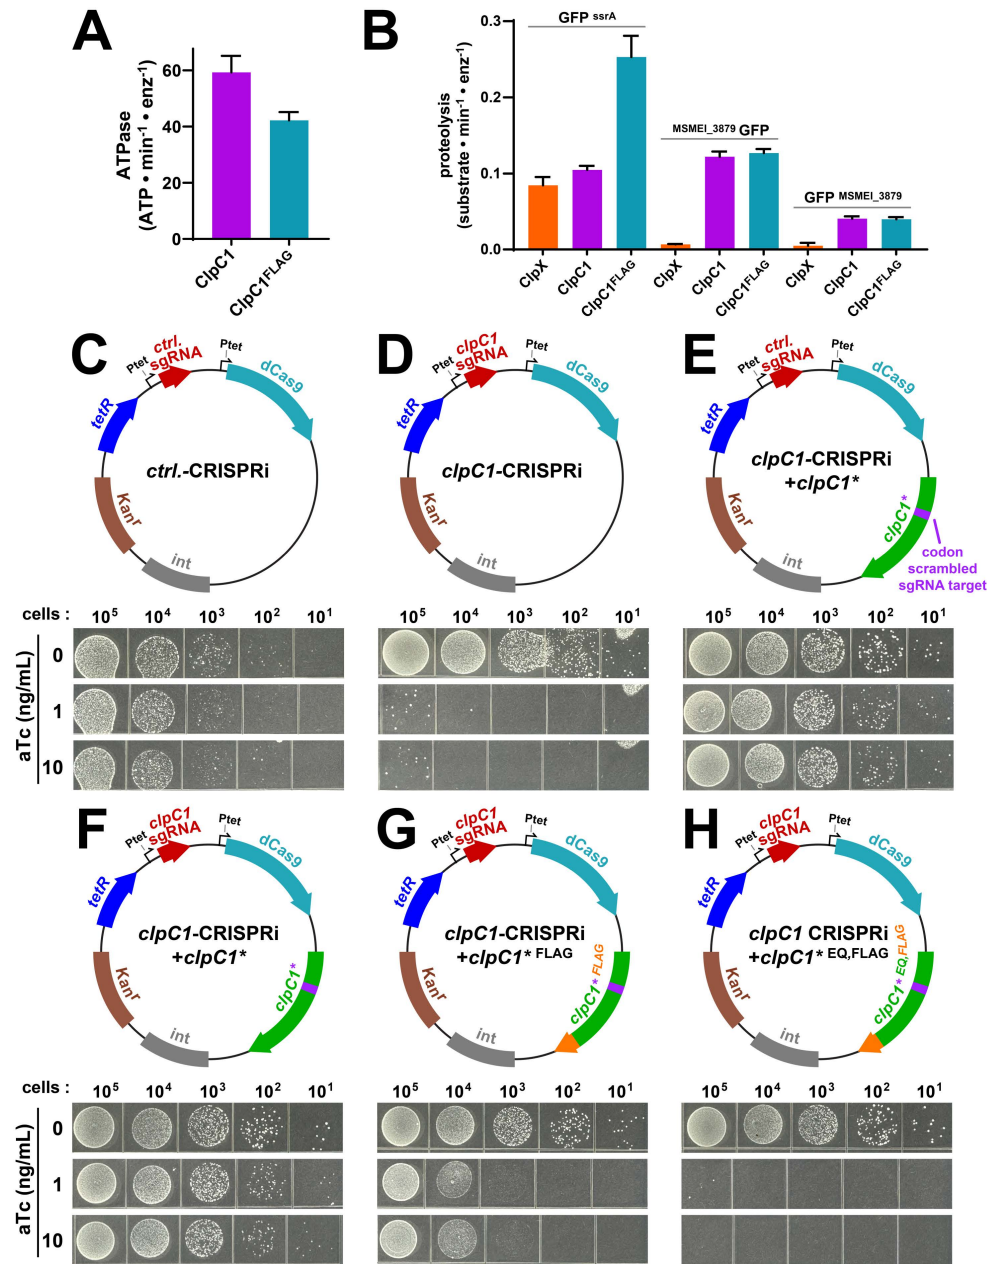

**Supplemental Figure S1: ClpC1-FLAG is functional.** (A) C-terminally FLAG-tagged ClpC1 has a ~30% lower ATPase rate than untagged ClpC1. (B) Degradation of 10  $\mu$ M GFP<sup>ssrA</sup>, MSMEI\_3879GFP, or GFP<sup>MSMEI\_3879</sup> by 1  $\mu$ M ClpXP1P2, ClpC1P1P2, or ClpC1<sup>FLAG</sup>P1P2 demonstrates that ClpX does not recognize MSMEI\_3879 constructs, while ClpC1<sup>FLAG</sup> retains the ability to recognize these substrates. (C – H) *M. smegmatis* was transformed with an integrative CRISPRi plasmid carrying either (C, E) a non-targeting control sgRNA or (D, F, G, H) a ClpC1-targeting sgRNA. Additionally, some plasmids carried a supplemental copy of (E, F) wild-type *clpC1*, (G) *clpC1* with a C-terminal FLAG-tag, or (H) *clpC1* with both a FLAG-tag and inactivating mutations to ATPase active sites (“EQ”). All supplemental *clpC1* loci incorporate codon substitutions that escape sgRNA targeting, indicated by asterisks.

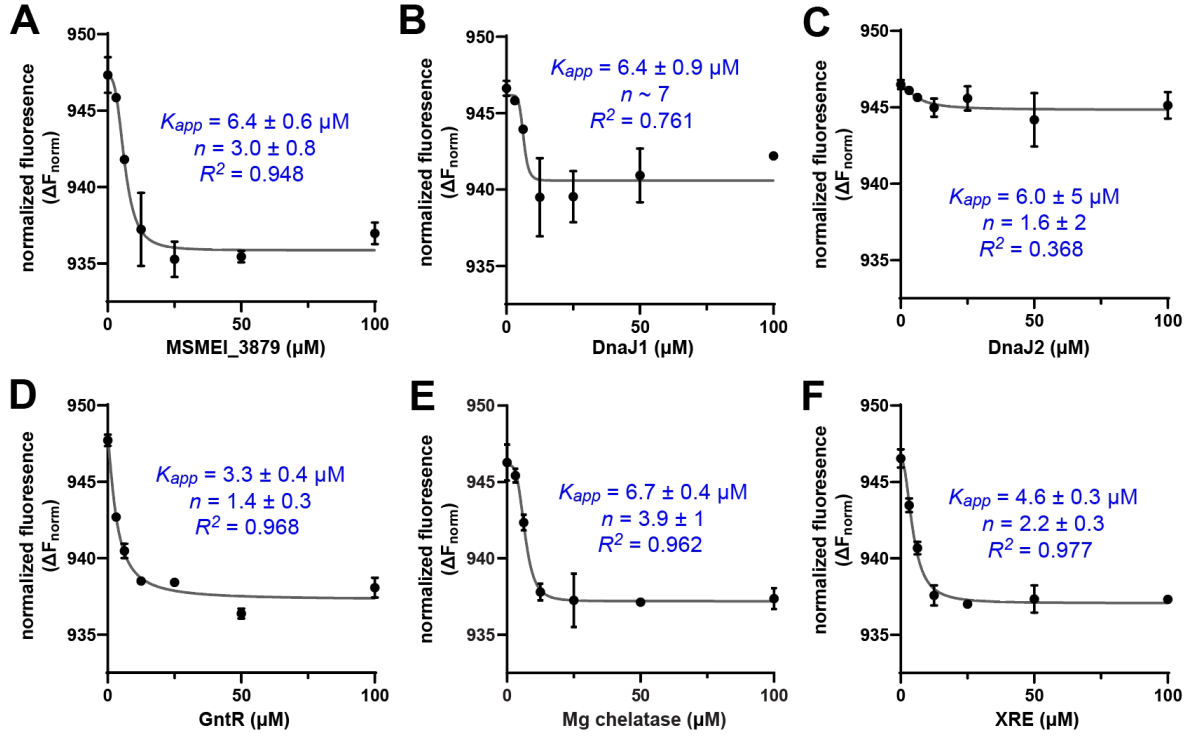

**Supplemental Figure S2: Candidate interaction partners bind to ClpC1 *in vitro*.** Binding of  $0.1 \mu\text{M}$   $^{7x}\text{His-SUMO-ClpC1}^{\text{FLAG}}$  to purified (A) MSMEI\_3879, (B) DnaJ1, (C) DnaJ2, (D) GntR, (E) Mg chelatase, or (F) XRE was assayed by microscale thermophoresis in the presence of 1 mM ATP $\gamma$ S. Data were fit to a Hill binding equation, and fit parameters are shown.

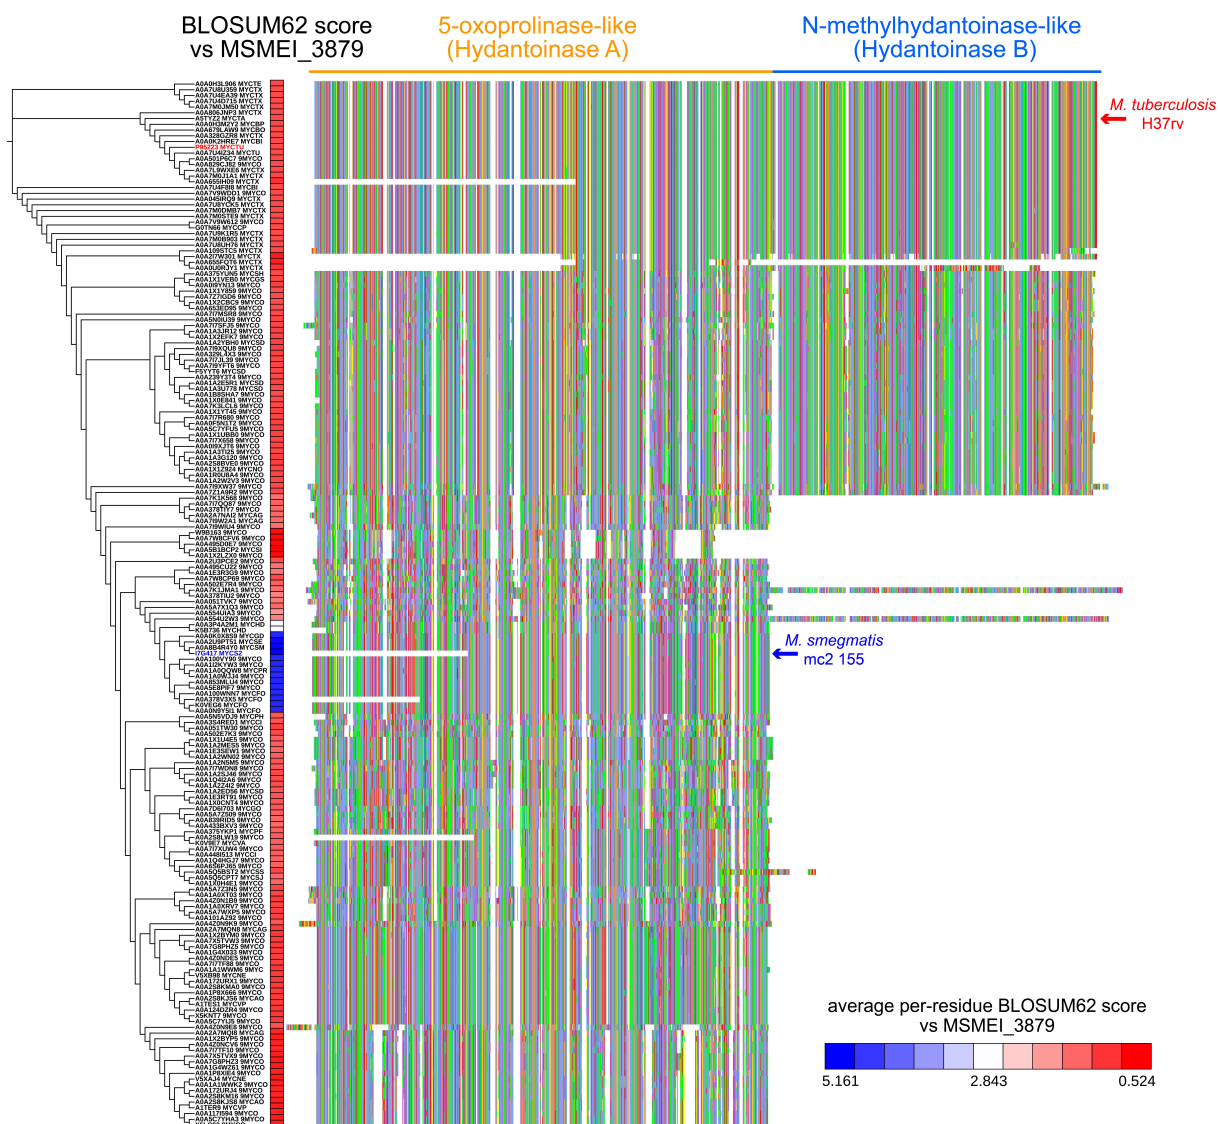

**Supplemental Figure S3: Phylogenetic analysis of MSMEI\_3879 homologs.** Homologs of MSMEI\_3879 in Mycobacteriaceae were compiled, aligned, and used to generate a phylogenetic tree. The average per-residue BLOSUM62 score of each sequence to MSMEI\_3879 is shown as a heatmap strip. A representation of the sequence alignment, colored according to residue type, is shown alongside the tree. *M. smegmatis* MSMEI\_3879 (blue) and *M. tuberculosis* OplA (red) are indicated.

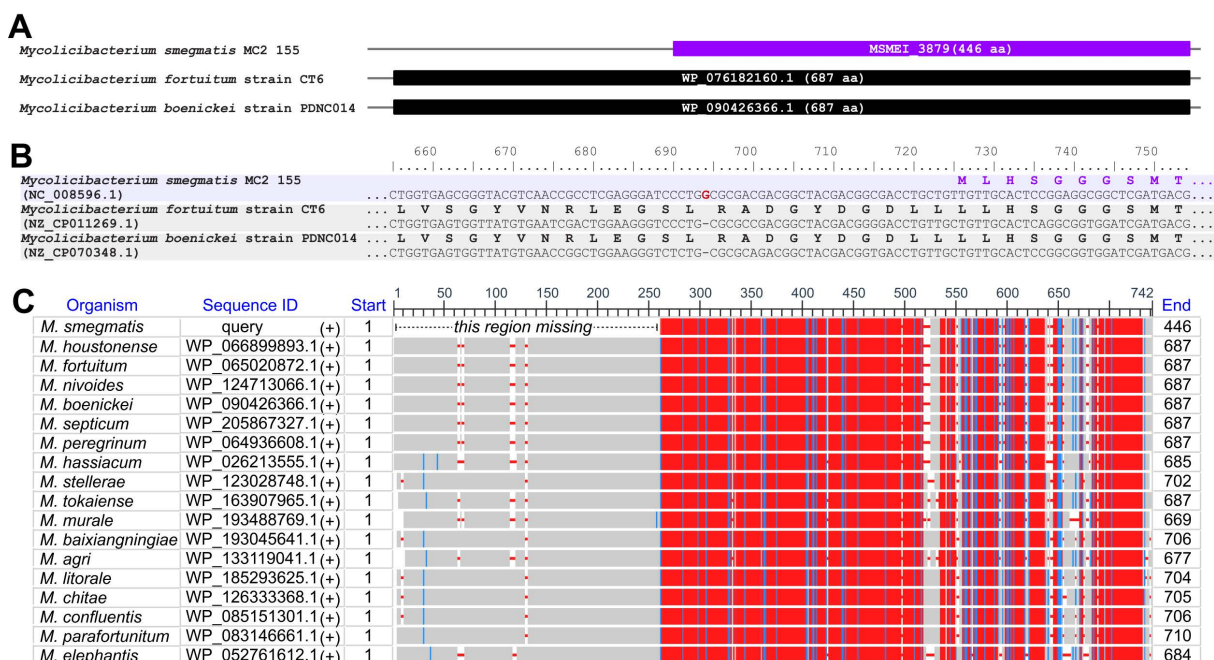

**Supplemental Figure S4: Comparison of MSMEI\_3879 to full-length homologs. (A)** Genetic context of *M. smegmatis* MSMEI\_3879 compared to the equivalent genomic region in the indicated *Mycobacterium* species. **(B)** Sections of genomic sequence show the beginning of the disrupted *M. smegmatis* hydantoinase/oxoprolinase gene and the analogous regions in the intact genes of *M. fortuitum* and *M. boenickei*. Numbering is given from the beginning of the normal intact open reading frame. Amino acid translations of MSMEI\_3879 (purple) and hydantoinase/oxoprolinase orthologs (black) are shown. A single nucleotide insertion in the *M. smegmatis* genome (red) disrupts the gene. **(C)** NCBI protein BLAST was used to align MSMEI\_3879 (top) with full-length hydantoinase/oxoprolinase orthologs from select *Mycobacterium* species. The upstream region missing in MSMEI\_3879 is indicated.

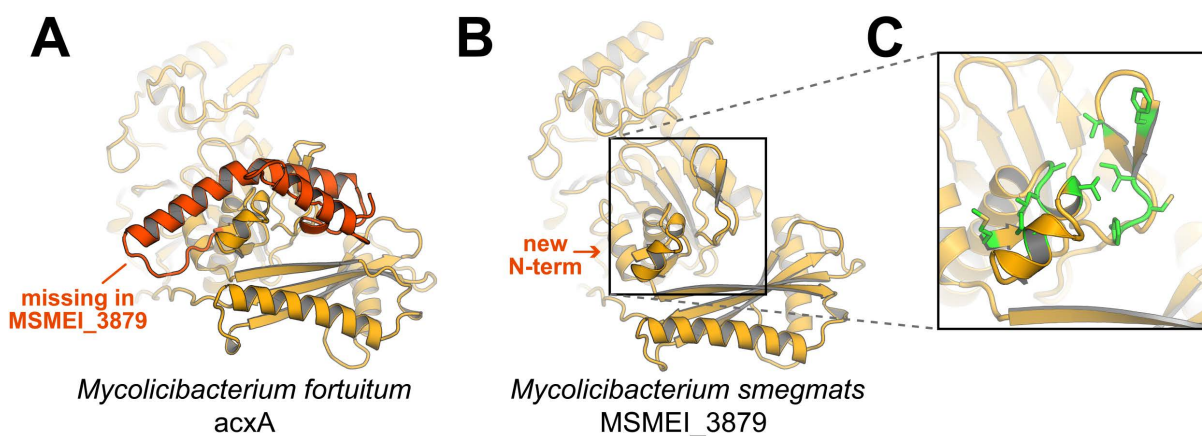

**Supplemental Figure S5: Structure prediction of MSMEI\_3879.** AlphaFold2 structure predictions of **(A)** *M. fortuitum* acxA, which lacks an N-terminal truncation, and **(B)** *M. smegmatis* MSMEI\_3879 are shown as cartoons. The region missing due to truncation of MSMEI\_3879 is shown as orange in acxA. **(C)** Loss of this region exposes hydrophobic residues (green) on structured elements that project from the folded core of the protein.

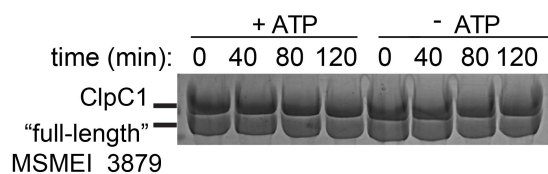

**Supplemental Figure S6: "Full-length" MSMEI\_3879 is not degraded by ClpC1P1P2.** Proteolysis of purified "full-length" MSMEI\_3879, with restored N-terminus, was assayed by SDS-PAGE as in Figure 7B.
